# Supplementary material
Source: PubMed Central journal article supplement (PMC4999076)
Supplement: NIHMS802146-supplement.pdf [file NIHMS802146-supplement.pdf]

## **Appendix. Definition and criteria of healthcare visits**

**Visit** – face-to-face contact between patient and provider

- Not including tests (e.g. echocardiograms, imaging, colonoscopies)
- Not including written or telephone correspondences

**Mental health diagnosis** – a patient was defined as having a mental health diagnosis in the past year if the following were present:

1. Visit to any healthcare provider described a mental health diagnosis (e.g. mood disorder, psychotic disorder, anxiety, substance abuse disorder other than tobacco) as an active issue discussed during the visit and/or included in the final treatment
2. Record of a provider renewing or prescribing an anti-depressant, mood stabilizer, or a documented phone call to discuss mental health

### **Mental health visit**

Mental health or substance abuse diagnosis listed as an active issue in the final impression/plan, not including nicotine dependence

1. Did not include marital counseling, sex therapy, sleep studies

### **Inpatient admission and length of stay**

- One visit constituted by a hospital admission note and a hospital discharge summary
  - o Multiple interactions with various healthcare providers and specialties encompassed in same visit
- Length of stay started at hospital admission date and ended at hospital discharge summary date
  - o If hospital admission and discharge occurred in the same day, length of stay = one day
- Included operations (documentation had to include an operation note)
